# Supplementary material for: Prognostic significance of an autophagy-related long non-coding RNA signature in patients with oral and oropharyngeal squamous cell carcinoma
Source: PubMed Central journal article supplement — Oncol Lett. 2020 Nov 11;21(1):29. doi: 10.3892/ol.2020.12290 (PMC7681235; doi:10.3892/ol.2020.12290), 2020-11-11
Supplement: Supplementary_Data.pdf [file Supplementary_Data.pdf]

Figure S1. Autophagy genes co-expressed with the nine lncRNAs. The green circles represent lncRNAs, and the yellow circles represent autophagy genes. Red lines indicate a positive correlation. The area of the yellow circle was positively associated with the co-expression coefficient of the lncRNAs. lncRNA, long non-coding RNA.

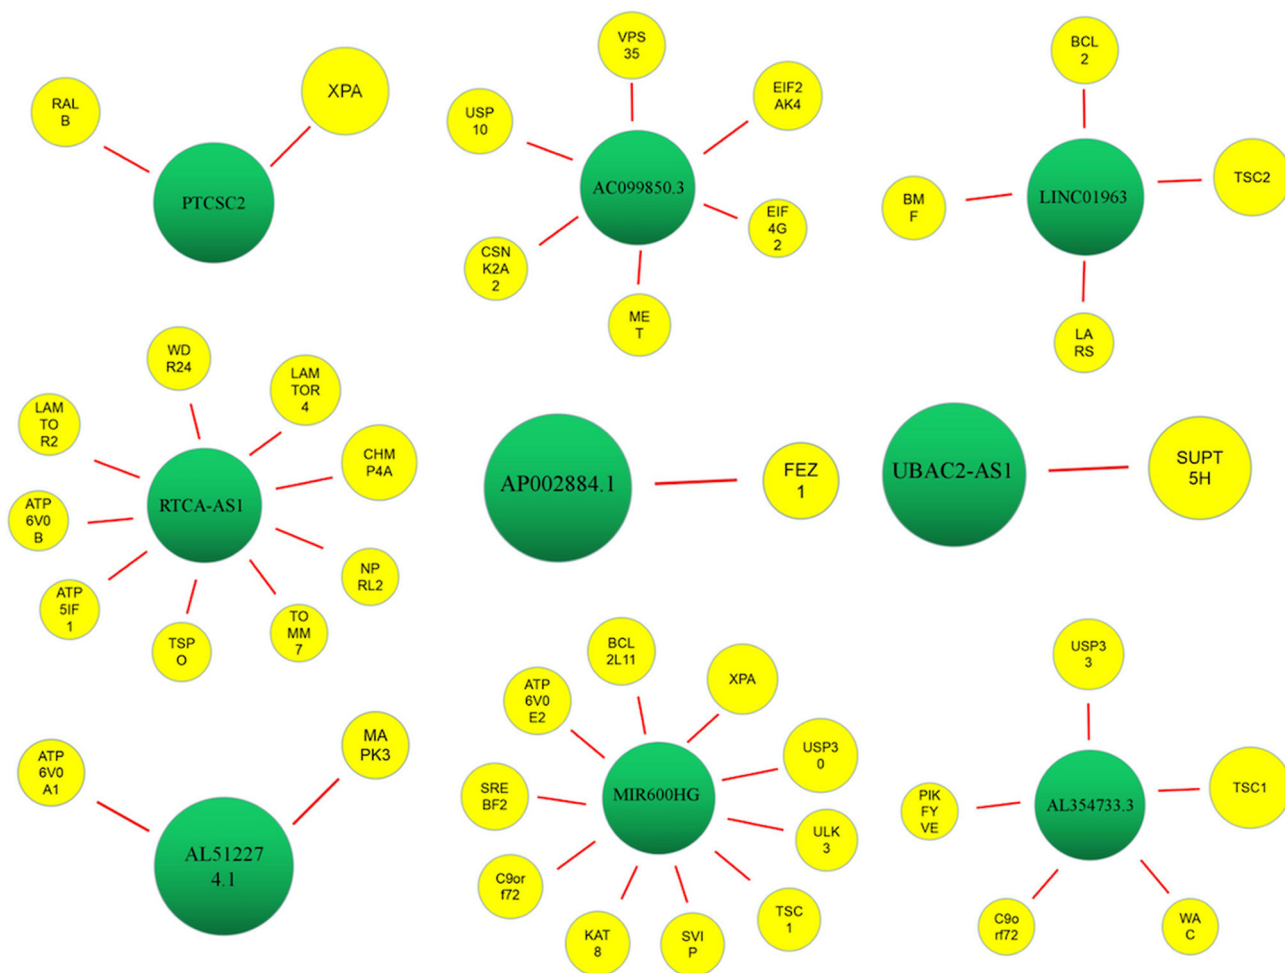

Table SI. Autophagy-related genes positively co-expressed with the nine lncRNAs.

| LncRNA     | Autophagy-related gene | Cor   | P-value                |
|------------|------------------------|-------|------------------------|
| PTCSC2     | XPA                    | 0.614 | 1.64x10 <sup>-33</sup> |
|            | RALB                   | 0.483 | 1.32x10 <sup>-19</sup> |
| AC099850.3 | EIF2AK4                | 0.482 | 1.88x10 <sup>-19</sup> |
|            | VPS35                  | 0.470 | 1.83x10 <sup>-18</sup> |
|            | USP10                  | 0.459 | 1.44x10 <sup>-17</sup> |
|            | CSNK2A2                | 0.443 | 2.48x10 <sup>-16</sup> |
|            | MET                    | 0.436 | 8.06x10 <sup>-16</sup> |
|            | EIF4G2                 | 0.409 | 6.47x10 <sup>-14</sup> |
| LINC01963  | TSC2                   | 0.533 | 3.81x10 <sup>-24</sup> |
|            | BCL2                   | 0.462 | 8.94x10 <sup>-18</sup> |
|            | BMF                    | 0.439 | 4.95x10 <sup>-16</sup> |
|            | LARS                   | 0.410 | 4.98x10 <sup>-14</sup> |
| RTCA-AS1   | CHMP4A                 | 0.531 | 6.20x10 <sup>-24</sup> |
|            | LAMTOR4                | 0.495 | 1.51x10 <sup>-20</sup> |
|            | WDR24                  | 0.447 | 1.25x10 <sup>-16</sup> |
|            | LAMTOR2                | 0.433 | 1.45x10 <sup>-15</sup> |
|            | ATP6V0B                | 0.423 | 6.99x10 <sup>-15</sup> |
|            | ATP5IF1                | 0.418 | 1.51x10 <sup>-14</sup> |
|            | TSPO                   | 0.417 | 1.92x10 <sup>-14</sup> |
|            | TOMM7                  | 0.405 | 1.09x10 <sup>-13</sup> |
|            | NPRL2                  | 0.402 | 1.72x10 <sup>-13</sup> |
|            | FEZ1                   | 0.415 | 2.43x10 <sup>-14</sup> |
| AP002884.1 | SUPT5H                 | 0.576 | 7.88x10 <sup>-29</sup> |
| UBAC2-AS1  | MAPK3                  | 0.409 | 6.14x10 <sup>-14</sup> |
| AL512274.1 | ATP6V0A1               | 0.408 | 6.92x10 <sup>-14</sup> |
| MIR600HG   | USP30                  | 0.532 | 3.36x10 <sup>-29</sup> |
|            | XPA                    | 0.502 | 9.63x10 <sup>-26</sup> |
|            | BCL2L11                | 0.485 | 7.40x10 <sup>-24</sup> |
|            | ATP6V0E2               | 0.484 | 9.74x10 <sup>-24</sup> |
|            | SREBF2                 | 0.481 | 1.84x10 <sup>-23</sup> |
|            | C9orf72                | 0.461 | 1.75x10 <sup>-21</sup> |
|            | KAT8                   | 0.461 | 1.78x10 <sup>-21</sup> |
|            | SVIP                   | 0.456 | 5.98x10 <sup>-21</sup> |
|            | TSC1                   | 0.451 | 1.70x10 <sup>-20</sup> |
|            | ULK3                   | 0.443 | 9.92x10 <sup>-20</sup> |
|            | ZKSCAN3                | 0.436 | 3.83x10 <sup>-19</sup> |
|            | BMF                    | 0.424 | 4.75x10 <sup>-18</sup> |
|            | TSC2                   | 0.416 | 2.27x10 <sup>-17</sup> |
|            | TP53INP1               | 0.412 | 5.27x10 <sup>-17</sup> |
|            | HDAC6                  | 0.411 | 5.63x10 <sup>-17</sup> |
|            | WDR6                   | 0.411 | 5.94x10 <sup>-17</sup> |
|            | KIAA1324               | 0.409 | 7.96x10 <sup>-17</sup> |
|            | SREBF1                 | 0.403 | 2.50x10 <sup>-16</sup> |
|            | MTMR3                  | 0.402 | 3.31x10 <sup>-16</sup> |
|            | BCL2                   | 0.400 | 4.43x10 <sup>-16</sup> |
| AL354733.3 | TSC1                   | 0.592 | 2.11x10 <sup>-37</sup> |
|            | USP33                  | 0.518 | 1.66x10 <sup>-27</sup> |
|            | PIKFYVE                | 0.417 | 1.98x10 <sup>-17</sup> |
|            | C9orf72                | 0.412 | 4.82x10 <sup>-17</sup> |
|            | WAC                    | 0.411 | 5.92x10 <sup>-17</sup> |

lncRNA, long non-coding RNA; Cor, correlation coefficient.
